1 **Comparative and population genomics landscape of *Phellinus noxius*:**  
2 **a hypervariable fungus causing root rot in trees**

3

4 Chia-Lin Chung<sup>¶1,2</sup>, Tracy J. Lee<sup>3,4,5</sup>, Mitsuteru Akiba<sup>6</sup>, Hsin-Han Lee<sup>1</sup>, Tzu-Hao  
5 Kuo<sup>3</sup>, Dang Liu<sup>3,7</sup>, Huei-Mien Ke<sup>3</sup>, Toshiro Yokoi<sup>6</sup>, Marylette B Roa<sup>3,8</sup>, Meiyeh J Lu<sup>3</sup>,  
6 Ya-Yun Chang<sup>1</sup>, Pao-Jen Ann<sup>9</sup>, Jyh-Nong Tsai<sup>9</sup>, Chien-Yu Chen<sup>10</sup>, Shean-Shong  
7 Tzean<sup>1</sup>, Yuko Ota<sup>6,11</sup>, Tsutomu Hattori<sup>6</sup>, Norio Sahashi<sup>6</sup>, Ruey-Fen Liou<sup>1,2</sup>, Taisei  
8 Kikuchi<sup>12</sup> and Isheng J Tsai<sup>¶3,4,5,7</sup>

9

10 <sup>1</sup>Department of Plant Pathology and Microbiology, National Taiwan University, Taiwan

11 <sup>2</sup>Master Program for Plant Medicine, National Taiwan University, Taiwan

12 <sup>3</sup>Biodiversity Research Center, Academia Sinica, Taipei, Taiwan

13 <sup>4</sup>Biodiversity Program, Taiwan International Graduate Program, Academia Sinica and  
14 National Taiwan Normal University

15 <sup>5</sup>Department of Life Science, National Taiwan Normal University

16 <sup>6</sup>Department of Forest Microbiology, Forestry and Forest Products Research Institute,  
17 Tsukuba, Japan

18 <sup>7</sup>Genome and Systems Biology Degree Program, National Taiwan University and Academia  
19 Sinica, Taipei, Taiwan

20 <sup>8</sup>Philippine Genome Center, University of the Philippines, Diliman, Quezon City, Philippines  
21 1101

22 <sup>9</sup>Plant Pathology Division, Taiwan Agricultural Research Institute

23 <sup>10</sup>Department of Bio-industrial Mechatronics Engineering, National Taiwan University,  
24 Taiwan

25 <sup>11</sup>College of Bioresource Sciences, Nihon University, Fujisawa, Japan

26 <sup>12</sup>Division of Parasitology, Faculty of Medicine, University of Miyazaki, Miyazaki, Japan

27

28 ¶ These authors contributed equally to this work

29 Correspondence: Chia-Lin Chung, [clchung@ntu.edu.tw](mailto:clchung@ntu.edu.tw), Taisei Kikuchi

30 ([taisei\\_kikuchi@med.miyazaki-u.ac.jp](mailto:taisei_kikuchi@med.miyazaki-u.ac.jp)) and Isheng Jason Tsai ([ijtsai@gate.sinica.edu.tw](mailto:ijtsai@gate.sinica.edu.tw))

31 **Abstract**

32

33 The order Hymenochaetales of white rot fungi contain some of the most aggressive  
34 wood decayers causing tree deaths around the world. Despite their ecological  
35 importance and the impact of diseases they cause, little is known about the evolution  
36 and transmission patterns of these pathogens. Here, we sequenced and undertook  
37 comparative genomics analyses of Hymenochaetales genomes using brown root rot  
38 fungus *Phellinus noxius*, wood-decomposing fungus *Phellinus lamaensis*, laminated  
39 root rot fungus *Phellinus sulphurascens*, and trunk pathogen *Porodaedalea pini*.  
40 Many gene families of lignin-degrading enzymes were identified from these fungi,  
41 reflecting their ability as white rot fungi. Comparing against distant fungi highlighted  
42 the expansion of 1,3-beta-glucan synthases in *P. noxius*, which may account for its  
43 fast-growing attribute. We identified 13 linkage groups conserved within  
44 Agaricomycetes, suggesting the evolution of stable karyotypes. We determined that *P.*  
45 *noxius* has a bipolar heterothallic mating system, with unusual highly expanded ~60  
46 kb *A* locus as a result of accumulating gene transposition. We investigated the  
47 population genomics of 60 *P. noxius* isolates across multiple islands of the Asia  
48 Pacific region. Whole-genome sequencing showed this multinucleate species contains  
49 abundant poly-allelic single-nucleotide-polymorphisms (SNPs) with atypical allele  
50 frequencies. Different patterns of intra-isolate polymorphism reflect  
51 mono-/heterokaryotic states which are both prevalent in nature. We have shown two  
52 genetically separated lineages with one spanning across many islands despite the  
53 geographical barriers. Both populations possess extraordinary genetic diversity and

54 show contrasting evolutionary scenarios. These results provide a framework to further  
55 investigate the genetic basis underlying the fitness and virulence of white rot fungi.

56

57

58

## 59 **Introduction**

60

61 Under most circumstances, fungi coexist with trees or act as saprotrophs responsible  
62 for carbon and nitrogen cycling in forest systems. However, some fungi are also one  
63 of the dominant groups of pathogens causing diseases in trees. There has been an  
64 emergence of tree disease outbreaks in different parts of the world such as ash  
65 dieback (Gross, Holdenrieder, Pautasso, Queloz, & Sieber, 2014), Dutch elm disease  
66 (Potter, Harwood, Knight, & Tomlinson, 2011), laminated root rot caused by  
67 *Phellinus sulphurascens* (Williams et al., 2014), and brown root rot caused by  
68 *Phellinus noxius* (Akiba et al., 2015; P. Ann, Chang, & Ko, 2002; Chung et al., 2015).  
69 Factors contributing to this phenomenon include climate change (Goberville et al.,  
70 2016) and human activity (Fisher et al., 2012). If interventions are not implemented  
71 early and effective, pathogen infections can kill millions of trees and the spread can  
72 become very difficult to stop (Cunniffe, Cobb, Meentemeyer, Rizzo, & Gilligan,  
73 2016).

74

75 Hymenochaetales is dominated by wood decay fungi and belongs to Agaricomycetes  
76 of Basidiomycota. Most species within this order are saprotrophic but some also  
77 exhibit pathogenic lifestyles that have been recorded in major forest incidents as early  
78 as 1971 in different parts of the world (Hepting, 1971; Norio Sahashi, Akiba, Ishihara,  
79 Ota, & Kanzaki, 2012). In particular, *P. noxius* has a very wide host range, spanning  
80 more than 200 broadleaved and coniferous tree species (at least 59 families) including  
81 many agricultural, ornamental, and forest trees such as longan, litchi, camphor,  
82 banyan, and pine (P. Ann et al., 2002; Norio Sahashi et al., 2014). Inoculation assays  
83 showed that only seven out of 101 tested tree cultivars (92 species) exhibited high  
84 resistance (P. J. Ann, Lee, & Huang 1999). Despite the recognized importance of *P.*  
85 *noxius* as an emerging pathogen, its genome, evolution and global population genetics  
86 is poorly understood. Previous reports based on simple sequence repeat (SSR)  
87 markers suggest the existence of highly diversified *P. noxius* populations (Akiba et al.,  
88 2015; Chung et al., 2015), but the isolates exhibited little to no host specificity (P. J.  
89 Ann et al., 1999; Nandris, Nicole, & Geiger, 1987; N. Sahashi, Akiba, Ishihara,  
90 Miyazaki, & Kanzaki, 2010). Currently, no gold standard genomes (Chain et al., 2009)  
91 are available for this group of wood decay fungi, which is a necessary step toward a  
92 better knowledge of their diversity, ecology and evolution.

93

94 The life cycle of *P. noxius* (P. Ann et al., 2002) is thought to be similar to other  
95 important root-rotting basidiomycetes, such as *Armillaria mellea* and *Heterobasidion*  
96 *annosum*. The new infection can start from previously infected plants/stumps or  
97 colonized wood debris, from which the mycelium of *P. noxius* grows to infect the

98 lateral and tap roots of the host tree (P. Ann et al., 2002). An invasion to the cortex  
99 and lignified xylem is usually observed (T.-T. Chang, 1992), sometimes accompanied  
100 by gradual expansion of the mycelial mat to the basal stem (Fig. 1A). Diseased trees  
101 with decayed roots may then show symptoms of foliar chlorosis, thinning leaves,  
102 defoliation, and eventually decline within a few months to several years. The  
103 damaged and fragile roots (Fig. 1B) also make the trees easily toppled over by strong  
104 winds and heavy rains. Basidiocarps are occasionally formed on trunks of infected  
105 trees (Fig. 1C-D). The sexual reproduction system of *P. noxius* has remained  
106 unclarified, partly due to the lack of clamp connections for diagnosing compatibility  
107 (P. Ann et al., 2002).

108

109 Brown root rot disease caused by *P. noxius* is widespread in tropical and subtropical  
110 areas in Southeast and East Asia, Oceania, Africa, Central America and the Caribbean.  
111 The geographical distribution appears to be related to the growth temperature range of  
112 *P. noxius*: 10-12°C to 36 °C, with optimum growth at 30 °C. In the past 20 years,  
113 brown root rot disease has become a serious threat to a variety of perennial fruit trees,  
114 ornamental and landscape trees, and shade trees in Taiwan (Chung et al., 2015) and in  
115 Ryukyu and Ogasawara Islands of Japan (Akiba et al., 2015). In Australia, it occurs in  
116 the natural and commercial plantation forests and orchards along the east coast, and  
117 has killed many trees in the Greater Metropolitan area of Brisbane Queensland  
118 (Schwarze, Jauss, Spencer, Hallam, & Schubert, 2012). In West Africa and China,  
119 brown root rot was reported as the most devastating root disease attacking the rubber  
120 plantations (Nandris et al., 1987). Trees in urban areas and plantation forests in Hong

121 Kong and Macao have also been seriously affected (Huang, Sun, Bi, Zhong, & Hu,  
122 2016; Wu et al., 2011). Field observations support the root-to-root spread as a major  
123 transmission mode of the epidemic. Recent population genetics studies based on SSR  
124 markers revealed highly diverse genotypes within populations and nearly identical  
125 genotypes from neighboring infected trees, suggesting that *P. noxius* spreads over  
126 short distances via root-to-root contact of the hosts, and the genetically variable  
127 basidiospores are likely involved in long-distance dispersal and the establishment of  
128 unique clones in new disease foci (Akiba et al., 2015; Chung et al., 2015).

129

130 In the present study, we aimed to further understand the evolution, reproductive  
131 system, and epidemiology in *P. noxius*, on the whole genomic basis. To achieve this,  
132 we first sequenced, assembled and annotated the genome sequences of four species  
133 from Hymenochaetales: *Phellinus noxius*, *Phellinus lamaensis* (wood decomposing  
134 fungus that causes a white pocket rot only on dead heartwood trees), *Phellinus*  
135 *sulphurascens* (syn. *Coniferiporia sulphurascens* (Zhou, Vlasák, & Dai, 2016);  
136 pathogen responsible for laminated root rot in Douglas-fir/ true fir), and  
137 *Porodaedalea pini* (syn. *Phellinus pini*; trunk pathogen of conifers). Focusing on *P.*  
138 *noxius*, its ~31Mb genome was sequenced to a high level of completion containing  
139 telomere-to-telomere chromosome sequences. By comparing against representative  
140 species of Basidiomycota, we investigated the genomic conservations and  
141 specialisations of this group and how these features possibly relate to the lifestyle of a  
142 wood-decayer. Second, we collected *P. noxius* isolates from diseased trees across  
143 Taiwan and Japanese offshore islands in 2007-2014. We sequenced the

144 whole-genomes of these 60 isolates and realigned against the *P. noxius* reference  
145 genome to identify single nucleotide polymorphisms (SNPs). Based on the genetic  
146 variation, the phylogenetic relationship of *P. noxius* populations within this Asia  
147 Pacific region was determined. We also quantified the extent of intra-isolate  
148 polymorphism to infer the frequencies of morphologically indistinguishable mono-  
149 and heterokaryons at infection sites. This allowed the confirmation of heterokaryosis  
150 is not necessary for pathogenicity in *P. noxius*.

151  
152

## 153 **Methods**

### 154 *Strain preparation and sequencing*

155 Genome sequencing of three *Phellinus* species and *P. pini* (Text S1) was performed  
156 using both Pacific Biosciences (*P. noxius*, *P. lamaensis*, *P. sulphurascens* and *P. pini*)  
157 and Illumina (*P. noxius*) platforms. DNA was isolated using the CTAB method  
158 (Chung et al., 2015). At least 15 µg DNA was used for a 20 kb library prep according  
159 to the manufacturer's instructions. Sequencing was performed on a Pacific  
160 Biosciences RS II system using 8 SMRT cell per run, P6C4 chemistry and 360 min  
161 movie time. A total of 5-7 SMRT cells were run per species yielding a raw depth of  
162 coverage of 173-266X. For samples underwent *de novo* assembly, genomic DNA  
163 were sheared in M220 Focused-ultrasonicator™ (Covaris) in microTUBE-50 (Covaris)  
164 under 250bp program (duty factor 20%, treatment for 120 sec) with gel size selection  
165 after adaptor ligation. For population resequencing samples, genomic DNA were

166 sheared in microTUBE-130 (Covaris) using 500bp shearing program (duty factor  
167 10%, treatment for 60 sec). Genomic libraries were prepared using TruSeq DNA LT  
168 Sample Prep Kit (Illumina). Input of 1  $\mu$ g sheared DNA was used for end-repair,  
169 A-tailing, adaptor ligation, and gel size selection. Size range at 600-700bps range was  
170 selected from gel and amplified by 5 cycles of PCR. In addition, Illumina mate-pair  
171 libraries were generated using 8  $\mu$ g of genomic DNA with gel size selection of  
172 tagmented DNA at 2-4 kb, 4-7 kb, 7-10 kb, and 10-20 kb, and amplified by 10~15  
173 cycles of PCR. These libraries were normalized by KAPA Library Quantification Kit  
174 (KAPA Biosystems), and pooled equally for PE2\*300 sequencing on MiSeq V2  
175 sequencer. The descriptions of the raw genomic data are available on Table S1.

176

177 To aid annotation for each of the species in this study, 7- to 21-day old mycelia from  
178 PDA cultures were used for RNA-seq. RNA-seq libraries were constructed using the  
179 Illumina TruSeq Stranded mRNA HT Sample Prep Kit with the dual index barcoded  
180 adaptors. Input of 3  $\mu$ g of total RNA was used for each sample for two rounds of  
181 oligo-dT bead enrichment, and the ligated cDNA were amplified by 10 cycles of PCR.  
182 The Stranded mRNA libraries were quantified by Qubit and molar concentrations  
183 normalized against the KAPA Library Quantification Kit (KAPA Biosystems) for  
184 Illumina platform. The transcriptome libraries were pooled at equal molar  
185 concentrations, and PE2\*151nt multiplexed sequencing was conducted on HiSeq  
186 2500 sequencer. The descriptions of the raw RNA-seq data are available on Table S2.

187

188 *Nuclear quantification*



189 Nuclei in the growing hyphal tips were stained following the procedure described by  
190 Chung et al. (2015). The mycelium on the slide was mounted in 20  $\mu$ l of a DAPI  
191 (4',6-diamidino-2-phenylindole) solution (10  $\mu$ g/ml in ddH<sub>2</sub>O) for an hour, destained  
192 in ddH<sub>2</sub>O for 30 min, then observed under a OLYMPUS BX41 microscope  
193 (Shinjuku-ku, Tokyo, Japan) equipped with filter cube U-MWU2 (BP 330–385 nm,  
194 LP 420 nm). Images were captured by using a Canon (Ohta-ku, Tokyo, Japan) digital  
195 camera EOS 700D. One hundred hyphal cells per strain were counted.

196

#### 197 *Genome assembly*

198 Genome assembly of different species was carried out with Falcon (ver 0.5.0; Chin et  
199 al., 2016) and were improved using Quiver (Chin et al., 2013) and finisherSC (Lam,  
200 LaButti, Khalak, & Tse, 2015). For assembly of individual strains of *P. noxius*,  
201 Illumina paired end reads were trimmed with Trimmomatic (ver 0.32; options  
202 LEADING:30 TRAILING:30 SLIDINGWINDOW:4:30 MINLEN:50; Bolger, Lohse,  
203 & Usadel, 2014) and subsequently assembled using SPAdes (ver 3.7.1; Bankevich et  
204 al., 2012). Multiple mate-pair reads were available for three strains of *P. noxius*  
205 (KPN91, A42 and 718-S1) and they were assembled using ALLPATH-LG (ver 49688;  
206 Butler et al., 2008) assembler and improved using Pilon (Walker et al., 2014). The *P.*  
207 *noxius* assembly was further merged with metassembler (ver 1.5; Wences & Schatz,  
208 2015), misassemblies were identified using REAPR (ver 1.0.18; Hunt et al., 2013)  
209 and manually corrected.

210

#### 211 *Gene predictions and functional annotation*

212 For *P. noxius*, the gene predictor Augustus (ver3.2.1; Stanke, Tzvetkova, &  
213 Morgenstern, 2006) was trained on a gene training set of complete core genes from  
214 CEGMA (ver2.5; Parra, Bradnam, & Korf, 2007) and subsequently used for manual  
215 curation of ~1000 genes. Annotation was then run by providing introns as evidence  
216 from RNA-seq data. For *P. lamaensis*, *P. sulphurascens* and *P. pini*, genes were  
217 predicted using Braker1 (ver 1.9; Hoff, Lange, Lomsadze, Borodovsky, & Stanke,  
218 2016) pipeline that automatically use RNA-seq mappings as evidence hints and  
219 retraining of GeneMark-ES (Borodovsky & Lomsadze, 2011) and Augustus. Gene  
220 product description was assigned using blast2go (ver 4.0.7; Conesa et al., 2005) and  
221 GO term assignment were provided by ARGOT2.5 (Lavezzo, Falda, Fontana, Bianco,  
222 & Toppo, 2016). The web server dbCAN (HMMs 5.0, last accessed September 5  
223 2016; Yin et al., 2012) was used to predict CAZymes from the protein sequences of  
224 all species, while AntiSMASH (ver 3.0; Weber et al., 2015) was used to predict  
225 secondary metabolite gene clusters. For dbCAN results, only hits with  $\leq 1 \times 10^{-5}$   
226 e-value and  $\geq 30\%$  HMM coverage were considered, while overlapping domains  
227 were resolved by choosing hits with the smallest *P*-value. Proteome completeness  
228 were assessed with BUSCO (ver 2.0; Simão, Waterhouse, Ioannidis, Kriventseva, &  
229 Zdobnov, 2015) using the Basidiomycota dataset.

230

### 231 *Comparative genomics analysis*

232 Gene families were determined by OrthoFinder (ver 1.0.6; Emms & Kelly, 2015).  
233 Then, MAFFT (ver 7.271; Katoh & Standley, 2014) was used to align sequences in  
234 each of 1,127 single-copy orthogroups. Alignments results with less than 10%

235 alignment gaps were concatenated, and the outcome was taken to compute a  
236 maximum likelihood phylogeny using RAxML (ver 7.7.8; Stamatakis, 2006) with 100  
237 bootstrap replicates. Gene family gain and loss in different positions along the global  
238 phylogeny leading to *P. noxius* were inferred using dollop (Felsenstein, 2005). Pfam  
239 and GO enrichments were carried out on these gene families using TopGO (ver 2.10.0;  
240 Alexa & Rahnenfuhrer, 2016). Sequences to be included in the phylogenetic tree for  
241 NACHT domain containing genes were selected on the basis of the presence of pfam  
242 domain PF05729.

243

#### 244 *MAT locus*

245 Homologs of the conserved genes in mating locus *A* and *B* were annotated in *P.*  
246 *noxius*, *P. pini*, *P. sulphurascens* and *P. lamaensis* (e-value < 10<sup>-5</sup>) then subjected to  
247 InterProScan 5 (ver 5.20-59.0; Jones et al., 2014) and Pfam (ver 30.0; Finn et al.,  
248 2016) for protein signature prediction. Syntenic alignment of *A* locus among  
249 *Phellinus* spp. and other species (sequences/annotations retrieved from Joint Genome  
250 Institute MycoCosm (Grigoriev et al., 2014)) was plotted using genoPlotR package  
251 (Guy, Roat Kultima, & Andersson, 2010) in R. The sequences of *A* locus in KPN91,  
252 718-S1 and A42 were further compared by MUMmer (ver 3.20; Stefan Kurtz et al.,  
253 2004) and PipMaker (<http://pipmaker.bx.psu.edu/cgi-bin/pipmaker?basic>; Schwartz et  
254 al., 2000). For identification of candidate pheromone genes, all the potential open  
255 reading frames were filtered for small peptides with C-terminal CaaX motif, then  
256 searched for pheromone homologies against Pfam-A and scanned for farnesylation  
257 signal by PrePs (<http://mendel.imp.ac.at/PrePS/>; Maurer-Stroh & Eisenhaber, 2005).

258

259 The sequences of *HD* and *STE3* genes were analyzed for 10 single-basidiospore  
260 isolates originating from a basidiocarp by the dideoxy termination method (primers  
261 listed in Table S3). Long-range PCR followed by primer walking was performed to  
262 sequence the highly diverse regions containing *HDI-HD2* in *A* locus. The outer  
263 primers were designed manually based on the alignment of all the isolates; the inner  
264 primers were developed step-by-step according to previous sequencing results. The  
265 PCR reaction was performed in 30- $\mu$ l reaction mixture containing 50 to 100 ng  
266 genomic DNA, 0.2 mM dNTP, 1X Ex Taq buffer [proprietary, containing 20mM  
267  $Mg^{2+}$ ] (Takara Bio Inc., Japan), 0.67  $\mu$ M forward and reverse primers, and TaKaRa  
268 Ex Taq® DNA polymerase (Takara Bio Inc., Japan). The thermal cycling parameters  
269 were 1 cycle of 95°C for 3 min, 30 cycles of 95°C for 30 s, 54°C for 30 s, and 72°C  
270 for 60–270 s (according to different product sizes, ~2 kb/min), and a final extension  
271 step of 72°C for 10 min. The PCR products were sequenced by Genomics  
272 Biotechnology Inc. (Taipei, Taiwan). DNA trace data were visualized using 4Peaks  
273 (<http://nucleobytes.com/4peaks>) and assembled using DNA Sequence Assembler in  
274 DNA Baser (<http://www.dnabaser.com>).

275

### 276 *Population genomics*

277 Paired end reads of 60 *P. noxius* strains (description listed in Table S4) were aligned  
278 to the KPN91 reference using Smalt (ver 5.7;  
279 [www.sanger.ac.uk/resources/software/smalt/](http://www.sanger.ac.uk/resources/software/smalt/)). Removal of PCR duplicates and bam  
280 file sorting were implemented with Picard (<http://broadinstitute.github.io/picard/>) and

281 samtools (ver 1.3-20-gd49c73b; Li et al., 2009). The first round of variant  
282 identification was implemented in Variscan (ver 2.4.0; Koboldt et al., 2012) and  
283 degree of heterokaryon was inferred in each strain based on allele frequency and total  
284 number of heterozygous SNPs called. The final list of SNPs was ascertained by  
285 combining evidences from samtools (ver 1.3-20-gd49c73b; Li et al., 2009) and  
286 FreeBayes (ver 1.0.2-16-gd466dde; Garrison & Marth, 2012). A maximum likelihood  
287 phylogeny of the SNPs segregating in these 60 strains was produced using FastTree  
288 (Price, Dehal, & Arkin, 2009). Plink (ver 1.9; C. C. Chang et al., 2015) was used to  
289 subset biallelic SNPs without linkage (filtering options: --maf 0.05 --indep-pairwise  
290 50 5 0.2), which were clustered using fastSTRUCTURE (ver 1.0; Raj, Stephens, &  
291 Pritchard, 2014) to determine the optimal number of populations. Strains were phased  
292 using samtools (ver 1.3-20-gd49c73b; Li et al., 2009) and one haplotype was chosen  
293 at random. Consensus sequences were generated from each strain using bcftools (ver  
294 1.3.1; Danecek et al., 2011) and population genetics analyses were conducted using  
295 Variscan (ver 2.0.3; Vilella, Blanco-Garcia, Hutter, & Rozas, 2005).

296

297

## 298 **Results**

299

### 300 *Genomes and annotations of four Hymenochaetales members*

301 We produced a 31.6 Mb *Phellinus noxius* genome reference assembly from a  
302 Japanese KPN91 isolate combining both Pacific biosciences and Illumina sequencing

303 platforms (Methods). The nuclear genome of *P. noxius* is assembled into 12 scaffolds  
304 with six assembled into chromosomes from telomere to telomere, while the  
305 mitochondrial genome is assembled into a single sequence of 163.4 kb. For a  
306 comprehensive understanding of genome evolution amongst members of the  
307 hymenochaetoid clade, we also sequenced and assembled three additional species: *P.*  
308 *sulphurascens*, *P. lamaensis* and *P. pini*, as well as two more isolates (A42 and  
309 718-S1) of *P. noxius*. The three assemblies of *P. noxius* have N50s of 2.4-2.7 Mb,  
310 whilst the other three genome assemblies comprise 30.7-53.3 Mb with N50's of 570  
311 kb-2.7 Mb.

312

313 A total of 9,833-18,103 genes were predicted in each species, which are 82-94%  
314 complete (Table S5). To compare these predicted proteins to those of other  
315 basidiomycetes to explore chromosome and gene family evolutionary dynamics, we  
316 selected the proteomes of fifteen species that are highly finished from the 1000  
317 Fungal Genomes Project (Table S5). The Hymenochaetales species have median  
318 intergenic and intron lengths of 507-634 bp and 59-60 bp, respectively, which are  
319 comparable with those observed in genomes of other basidiomycetes. The maximum  
320 likelihood phylogeny based on 1,127 single-copy orthologs placed these species with  
321 *Fomitiporia mediterranea* and *Schizopora paradoxa*, two other species of the  
322 Hymenochaetaceae group with strong bootstrap support (Fig. 1E). This phylogenetic  
323 relationship is consistent with previous findings (Larsson et al., 2006), and species  
324 with similar genome sizes and pathogenic habits are grouped together. For instance, *P.*  
325 *noxius* and *P. lamaensis* with compact genome sizes of ~31 Mb are grouped together,

326 while the trunk rot pathogens *P. pini* and *F. mediterranea* show an expansion of their  
327 genome sizes to 53-63 Mb and are also grouped together.

328

329 To explore the genomic architecture underlying the biological attributes of  
330 Hymenochaetales, we sought to identify genes and protein domains specific to  
331 Hymenochaetales by determining when a new gene family arose and if the family has  
332 expanded or contracted. In total, 7,125-11,659 proteins in the Hymenochaetales order  
333 are clustered together in 5,184 families. Acquisition of gene families was mainly  
334 found at the tips of the phylogeny (531-8,055 families) suggesting each species has a  
335 repertoire of specific genes. The seven Hymenochaetales species have a total of 62  
336 enriched protein domains compared to other basidiomycetes (Fig. S1). Gain of  
337 domains are highlighted such as fungal specific transcription factors (Fungal\_trans;  
338 53.8 vs 41.6 copies) and peroxidase associated protein domains (Peroxidase\_ext; 16.7  
339 vs 3.9 copies). These are expected as they are required for efficient degradation of  
340 lignin, a tough biopolymer present in woody plants (Dashtban, Schraft, Syed, & Qin,  
341 2010). Consistent with this, CAZymes spanning eight families of lignin-degrading  
342 enzymes (AA1-AA8) which include laccases, peroxidases, oxidases, and reductases,  
343 and a lytic polysaccharide mono-oxygenase family (LPMO; AA9) were found in all  
344 Hymenochaetales species (Table S6).

345

346 *Genome conservation and specialisation of Phellinus noxius*

347 Although *P. noxius* has a compact genome, 74% (7,313) of its 9,833 predicted genes  
348 have orthologs from at least one of the other basidiomycetes, suggesting most of the

349 basidiomycetous core genes are conserved. As a chromosome level assembly is now  
350 available in Hymenochaetales, we attempted to characterize chromosome architecture  
351 and evolution amongst the Agaricomycotina sub-division. The number of known  
352 karyotypes in Basidiomycota ranges from 11 to 14 chromosome pairs (Table S5),  
353 which suggests a possible ancestor with similar chromosome numbers. We  
354 constructed a linkage network of seven selected species with chromosome sequences  
355 based on single-copy orthologs between species pairs. Indeed, we identified 13  
356 distinct linkage groups (LG) providing strong evidence that chromosome  
357 macro-synteny is largely conserved since the common ancestor of Agaricomycetes  
358 (Fig. 2A). Strikingly, such a relationship even extended to Dacrymycetes where  
359 multiple scaffolds can be predominantly assigned to different linkage groups, but it is  
360 no longer apparent when compared to Tremellomycetes. Certain scaffolds are found  
361 to connect different linkage groups, implying inter-chromosomal rearrangements. For  
362 example, *P. noxius* scaffold1 is strongly clustered in LG11 but also shows linkage to  
363 LG10, implying a translocation from scaffold5 (Fig. 2). Within each linkage group,  
364 gene collinearity is no longer apparent, suggesting high levels of intra-chromosomal  
365 rearrangements which have been observed in different fungal groups (Hane et al.,  
366 2011) (Fig. 2B).

367

368 Consistent with the fact that *P. noxius* is an extremely fast grower (P. Ann et al.,  
369 2002), we identified a strikingly 7-fold increase in 1,3-beta-glucan synthase (14  
370 compared to an average of 1.8 copies), which is responsible for the formation of  
371 beta-glucan components in fungal cell wall (Douglas, 2001). *P. noxius* contains a



372 comprehensive repertoire of carbohydrate-active enzymes; a total of 416 proteins of  
373 its proteome were identified as CAZymes (Table S6). This number makes up 4.23%  
374 of *P. noxius*'s proteome which is more than those in the other Hymenochaetales,  
375 suggesting these genes are necessary and have been retained despite a genome size  
376 compaction. Taken together, being able to grow fast and the diversity of the  
377 CAZymes encoded in the *P. noxius* genome suggest its capability to infect a wide  
378 range of hosts. Additionally, counts of WD40 protein domains are highest in *P.*  
379 *noxius* and *P. lamaensis* despite their small genome size (Table S7). This domain is  
380 important in protein-protein interactions of cellular networks and is usually associated  
381 with additional domains (Leipe, Koonin, & Aravind, 2004). Interrogating this  
382 expansion revealed the association of WD40 domains with the AAA and NACHT  
383 domains (Table S7), both of which are NTPase domains and such combinations are  
384 commonly found in nucleotide-binding-oligomerization-domain like receptors  
385 (NLRs). A maximum likelihood phylogeny of the NACHT domain proteins shows  
386 different expansions of NLR subfamilies in fungi (Fig. S2). In particular, the  
387 C2-NACHT-WD40(n) subfamily has only been found exclusively in a few  
388 basidiomycetes (Van der Nest et al., 2014) and is present in the highest copy number  
389 in *P. noxius* and *P. lamaensis*. Other expansions include  
390 UDP-glucuronosyltransferases, which catalyse conjugation reactions in the  
391 biotransformation of xenobiotics released by its host environment (Jancova,  
392 Anzenbacher, & Anzenbacherova, 2010).

393

394 *P. noxius* displays a bipolar heterothallic mating system

395 Determination of mating loci and reproductive mode is considered high-priority in  
396 fungal genome analyses as they are the primary determinants of how a fungus  
397 expands and generates diversity. Mate recognition of sexual reproduction in  
398 Basidiomycota is known to be controlled by two unlinked loci, named as *A* and *B*  
399 locus. A conserved head-to-tail orientation of *HD1-HD2* in *HD* pair 1 was found in  
400 Hymenochaetales (Fig. 3) which is different from in most species in Agaricomycetes  
401 (James et al., 2013). Alignment of 100-kb sequences upstream and downstream of *A*  
402 locus in *P. noxius* isolates KPN91, 718-S1 and A42 revealed that *A* locus is highly  
403 polymorphic (*HD* pairs in particular) despite well-conserved flanking regions (Fig.  
404 S3). For *B* locus, only one *STE3* encoding seven transmembrane helices was  
405 identified; four pheromone genes were identified but not physically linked to the  
406 highly monomorphic *STE3* (Fig. S4, Table S8, Text S1), which is characteristic of a  
407 bipolar mating system.

408

409 To further confirm this observation, allele diversity was analyzed by resequencing the  
410 *A* and *B* loci from 10 single-basidiospore isolates originating from a single  
411 basidiocarp (Table S9). Sequencing of *STE3* revealed two highly similar alleles (b1,  
412 b2), with 99.5% amino acid identity. The only variant (244V/A) is considered a  
413 semi-conservative mutation (valine and alanine are nonpolar aliphatic acids) and may  
414 have minor or no effect on protein function. Previous studies have shown that  
415 although *STE3* is not involved in mating type determination in bipolar fungi,  
416 variations can still be observed (James, Lee, & van Diepen, 2011; James, Srivilai,  
417 Kues, & Vilgalys, 2006; Niculita-Hirzel et al., 2008). Primer walking of *A* locus

418 revealed two distinct haplotypes which suggests a heterothallic bipolar reproductive  
419 mode in *P. noxius* (Fig. S5): the a1 and a2 alleles of *HD* pair I shared an overall 78%  
420 nucleotide identity; the two alleles of *HD* pair II were highly divergent and the HD1  
421 domain in a2 allele contains a 1-bp and a 9-bp deletions and has become a  
422 pseudogene. The loss of HD1 domain was also found in the *HD* pair I of 718-S1 (Fig.  
423 3), suggesting that at least one of the HD1 motifs in *A* locus is dispensable for a  
424 functional HD1-HD2 heterodimer in *P. noxius*. The presence or absence of specific  
425 HD domains reflects phylogenetic characteristics and has been commonly observed in  
426 fungi (Kües, 2015).

427

#### 428 *P. noxius* contains a highly polymorphic *A* locus

429 Distinct from all the other fungi, *P. noxius* has an exceptionally highly expanded *A*  
430 locus across a ~60-kb region (Fig. 3). There are two pairs of HD1-HD2 gene located  
431 ~50-kb away from each other. In the case of *P. noxius* KPN91, 14 genes were  
432 annotated at the *A* locus (Fig. 3). Orthology analysis placed these genes into 9  
433 families that are also present in other fungi (Fig. 4). However, in the genomes of other  
434 species, the majority of homologous members of different families are not located in  
435 proximity to each other (Fig. 4). This indicates that the large interval in *P. noxius* is a  
436 result of accumulating transposition of genes from conserved fungi families not in  
437 proximity to *A* locus (Fig. 4). Interestingly, different *P. noxius* isolates display  
438 different interval lengths at *A* locus, suggesting that transposition events may be  
439 frequent (Fig. 3). Whether transposition plays an additional role in the mating system  
440 remains to be clarified.

441

442 *Sequence analysis of 60 P. noxius strains*

443 To further understand the regional dissemination of *P. noxius*, we sequenced the  
444 genomes of 60 isolates (Fig 5A) originating from diseased trees across 13 Taiwan and  
445 Japanese offshore islands from 2007-2014. This collection was sequenced to a median  
446 depth of coverage of 35X. To characterize chromosomal synteny relationship,  
447 additional mate pair libraries were sequenced for two isolates (718-S1 and A42). An  
448 average of 96% mapping rate was achieved after aligning reads from each strain to  
449 the KPN91 reference genome. The descriptions and statistics of the strains are  
450 provided in Table S4.

451

452 *Diversification of P. noxius across Pacific Ocean islands*

453 We hypothesized that there may be three populations segregating in this area of  
454 Pacific Islands: Taiwan, Ryukyu and Ogasawara islands. To examine the population  
455 structure of *P. noxius* in this area, we performed principal-component analysis (Fig.  
456 5B) on the SNP variants from individual phased haploid genomes. The major  
457 principal component divided Ogasawara islands samples from the rest of the samples,  
458 which are located geographically 1,210 km apart. The second and third principal  
459 components defined a tight cluster of Taiwanese isolates with considerable overlaps  
460 between cities despite being 170 km apart. Most isolates from Ryukyu islands can be  
461 differentiated from those from Taiwan (Fig. S6). Interestingly, we identified three  
462 isolates from Taiwan that are distinctive from both the Taiwan-Ryukyu and

463 Ogasawara island clusters, suggesting a possibility of more genetically distinct  
464 populations within the Taiwan island.

465

466 We constructed a maximum likelihood phylogeny based on 1,837,281 high  
467 confidence SNPs of *P. noxius* (Fig. 5C). Concordant with the PCA, the nine isolates  
468 from Ogasawara islands form a distinctive lineage, while the 51 Taiwanese and  
469 Ryukyu islands isolates are grouped together forming another major lineage. We  
470 inferred the population structure in 144,426 unlinked biallelic sites using the Bayesian  
471 model-based clustering approach implemented by fastSTRUCTURE (Raj et al., 2014).  
472 Consistent with the phylogeny, two Taiwan-Ryukyu and Ogasawara lineages were  
473 identified and circulating in this region (highest likelihood with  $K = 2$ ; Fig. 5C).  
474 Higher  $K$  values shows that the isolates from Ogasawara islands remain one cluster,  
475 while the rest of the isolates (independently of their geographical origins) are grouped  
476 into genetically homogeneous clusters with little admixture (Fig. S7).

477

478 Further inspection of the phylogeny indicated the possibility of gene flow in this  
479 region despite physical separation by the sea. Within the Ogasawara clade, the  
480 isolates can be further grouped by their geographical origin (two main islands:  
481 Hahajima and Chichijima island separated by 50km) with the exception of KPN334  
482 strain. Strain KPN260 was collected from Anijima island which is geographically in  
483 proximity to Chichijima island but was grouped with the Hahajima island isolates.  
484 Strains collected from within Amami and Okinawa islands are not grouped together  
485 on the phylogeny, suggesting independent origins of *P. noxius* infection in both

486 regions. The pattern of gene flow was more apparent in the 42 isolates collected in  
487 two cities of Taiwan, where the isolates were not grouped in the phylogenetic tree  
488 according to their geographical origins.

489

#### 490 *Stable structural variation and intra-isolate polymorphism*

491 The detection of frequency of heterokaryons and polyploids of *P. noxius* in nature  
492 remain challenging as its arthrospores contain 1-5 nuclei (based on quantification of  
493 145 arthrospores from A42 in this study) and multiple allelic fragments in SSRs (2-4  
494 alleles per locus) are commonly found in populations (Akiba et al., 2015; Chung et al.,  
495 2015). All the strains were isolated from either a single arthrospore or fungal mat, and  
496 thus allowed for the analysis of variation in genome structure. We found no deviation  
497 in coverage across every scaffold in all strains (Fig. S8), suggesting a stable number  
498 of chromosome copies in *P. noxius*. To distinguish the frequency of mono- or  
499 heterokaryons in nature, heterozygous SNPs and minor allele frequency (MAF)  
500 distribution were inferred in each strain (Fig. 6). We identified four groups (A to D)  
501 that clearly differ in heterozygosity and MAF. The group A with the lowest  
502 heterozygosity of averaging 0.2 % includes strains 718-S1 and A42, each isolated  
503 from a single basidiospore implying they are monokaryotic in nature. All strains in  
504 this group exhibited a flat MAF distribution, suggesting that there are spontaneous  
505 mutations segregating during the growth of monokaryons that originated at different  
506 times. The occurrences of monokaryons are 11% and 47% in the Ogasawara and  
507 Taiwan/Ryukyu lineages, respectively. The prevalence of monokaryotic isolates

508 suggests the involvement of basidiospores in disease spread and that heterokaryosis is  
509 not required for pathogenicity.

510

511 58% of strains display a much higher heterozygosity, with strain Pn103 having a 1.7%  
512 heterozygosity displaying a peak around 50% in MAF distribution. These strains can  
513 be further grouped into three categories with distinct MAF profile and  
514 heterozygosities (Fig. 6). The largest group of the three (n=19; group D of Fig.6) has  
515 on average 1.6% heterozygosity displaying a peak around 50% in MAF distribution,  
516 suggesting the presence of two genetically distinct nuclei within the population, i.e.,  
517 dikaryons. The remaining two groups did not follow a typical di-karyon MAF  
518 distribution, as they peaked around 27%-33% and exhibited different heterozygosities.  
519 The deviations may be associated with the number and composition of multiple nuclei  
520 in a cell. However, nuclear quantification of seven randomly selected isolates showed  
521 no differences between the groups (Fig. S9). These groups may refer to different  
522 compositions of two or more genetically distinct nuclei.

523

#### 524 *High nucleotide diversity in P. noxius populations*

525 The *de novo* assemblies of three strains of *P. noxius* have on average 97% nucleotide  
526 identity and are largely co-linear to each other with apparent genome translocations  
527 between Taiwan/Ryukyu (A42 and KPN91) and the Ogasawara (718-S1) isolate (Fig.  
528 S10). We quantified sequence diversity using  $\theta_s$  and  $\theta_\pi$  and categorised them into  
529 whole genome average, four-fold synonymous sites and replacement sites (Table 1).  
530 A large number of segregating SNPs are found in the genome of *P. noxius*, averaging

531 one SNP identified in every 20-59 bp. Nucleotide diversity at synonymous sites  
532  $\theta_{\pi\text{-syn}}$  is 15.8 and 19.2 per kilobase in Ogasawara island and Taiwan-Ryukyu  
533 populations, respectively. This is ~5 fold higher when compared to the majority of  
534 species (Leffler et al., 2012) and is likely an underestimate of true diversity as indels  
535 were not considered. Taiwan-Ryukyu lineage has a much higher diversity than  
536 Ogasawara which is not due to sample size difference; the same was observed when  
537 we reanalyzed with only 9 randomly chosen strains in the Taiwan-Ryukyu  
538 populations. Extremely high diversity has been reported in natural populations of  
539 *Schizophyllum commune* (Baranova et al., 2015). The Tajima's D is strongly negative  
540 in the Taiwan and Ryukyu islands lineage, suggesting an excess of low frequency  
541 alleles present in the population possibly as a result of high mutation rate (Baranova  
542 et al., 2015) or population expansion. In the Ogasawara population, nucleotide  
543 diversity is reduced compared to the Taiwan/Ryukyu lineage and Tajima's D is  
544 positive implying a reduced effective population size; *P. noxius* may have been  
545 introduced recently in these islands. Together our data suggest that the two *P. noxius*  
546 lineages may have derived from genetically distinct gene pools and have undergone  
547 divergent evolutionary scenarios, possibly as a result of different time of introduction,  
548 different environments, and human interference in Taiwan-Ryukyu vs Ogasawara  
549 areas.

550

#### 551 *Candidates for population differentiation*

552 The Taiwan/Ryukyu strains were mainly isolated from diseased trees in urban settings,  
553 while the Ogasawara strains were from trails in natural parks (Table S4). Genomic



554 pairwise  $F_{ST}$  revealed moderate differentiation (0.12) between the two genetic  
555 lineages of *P. noxius*, which is in accordance with both the phylogeny and  
556 fastSTRUCTURE analyses. We identified genomic regions that may contain potential  
557 candidates for such environmental origins by investigating 99.9% tail for observed  
558  $F_{ST}$  5-kb windows (Fig. 7). This definition revealed 13 outlier regions. Gene ontology  
559 analyses of 42 genes within these regions did not reveal any GO enrichment terms,  
560 indicating the sites showing evidence of differentiation may be involved in different  
561 functions. Interestingly, the largest region spanning 12 kb at scaffold 6 contains four  
562 genes. Homologs from three of the genes are implicated in fungal cell wall  
563 organization and fruiting body formation (PNOK\_0653900; (Szeto, Leung, & Kwan,  
564 2007)), salt tolerance (PNOK\_0654000; (Steffens, Brautigam, Jakoby, & Hulskamp,  
565 2015)), and plant cell wall degradation (PNOK\_0654100; xylanase). These are all  
566 possible drivers for population differentiation (Apse, Aharon, Snedden, & Blumwald,  
567 1999).

568

## 569 **Discussion**

570 Here we report four high-quality genome sequences of Hymenochaetales species that  
571 are global tree pathogens of particular importance. To date chromosome-level  
572 assemblies are available only for a few basidiomycetous species (Manuel Alfaro et al.,  
573 2016; Foulongne-Oriol et al., 2016; J. E. Stajich et al., 2010) including *P. noxius*  
574 (Table S5). Orthologous relationships with other complete genomes of  
575 basidiomycetes have confirmed conservation of karyotypes with few fusion or breaks

576 in Agaricomycetes. Our study has shown the diversity and abundance of CAZymes,  
577 in particularly lignin-degrading enzymes, in the genomes of Hymenochaetaeae  
578 species. Such genetic architecture has been demonstrated in other white rot fungi  
579 (Riley et al., 2014), and differences in CAZymes have been implicated as the genetic  
580 basis of softwood or hardwood utilization (Suzuki et al., 2012). As revealed by  
581 comparative genomics analysis, *P. noxius* has highly expanded 1,3-beta-glucan  
582 synthase genes and abundant CAZymes, making it an aggressive wood decay  
583 pathogen of a wide variety of both broadleaved and coniferous trees. The results can  
584 serve as a starting point for understanding the ecological role of *P. noxius*. Our study  
585 also identified high copy numbers of C2-NACHT-WD40(n)-containing NLRs and  
586 candidate genes associated with population differentiation. The NLR family is highly  
587 diverse in fungi and was found to be central to the process of programmed cell death  
588 and implicated in fungal vegetative incompatibility and general nonself recognition  
589 (Bidard, Clave, & Saupé, 2013). Analysis of global transcription at different  
590 pathogenesis stages and detailed functional assays will help resolve their functions.

591

592 Population genomics analyses of *P. noxius* suggest that it is a hypervariable species.  
593 Our investigations into mating type loci and genome-wide heterozygosity further  
594 indicated that the genetic hyperdiversity can be attributed to a bipolar heterothallic  
595 reproductive system and heterokaryotic nature, though gene flow and/or high  
596 mutation rate may also play some role. The characteristic large interval between *HD*  
597 pairs has only been reported in *Schizophyllum commune* (~55 kb) and *Flammulina*  
598 *velutipes* (~70 kb), in which the genomic separation likely emerged through

599 inversions or transpositions of gene clusters surrounding *HD* (van Peer et al., 2011).  
600 This exceptional large separation between *HD* pairs would allow higher probability of  
601 recombination between the physically distant *HD* genes (James et al., 2013; van Peer  
602 et al., 2011), thus resulting in progeny with more diverse mating types which are  
603 ready to mate. Notably, both monokaryotic and heterokaryotic state of *P. noxius*  
604 mycelia are prevalent in the nature, and some isolates likely contain more than two  
605 genetically different nuclei (Chung et al., 2015). In addition, some isolates were able  
606 to produce basidiocarps by themselves when cultured on sawdust medium (P.-J. Ann,  
607 pers. comm.), suggesting dikaryotization or homokaryotic fruiting occurred  
608 spontaneously or in response to certain conditions (Wendland, 2016). It would be  
609 interesting to further investigate the complex regulatory mechanisms underlying  
610 anastomosis, karyogamy, and meiotic division during vegetative growth and  
611 basidiocarp formation. Transcriptional diversity among genetically variable  
612 individuals is also warrant further exploration.

613

614 How *P. noxius* is spread in regions of Asia has been the focus of a few studies (Akiba  
615 et al., 2015; Chung et al., 2015; Hattori, Abe, & Usugi, 1996). Genomic analysis of  
616 the strains from across Taiwan and offshore islands of Japan allowed us to re-examine  
617 possible mode of disease transmission in the Asia Pacific region. The pattern of gene  
618 flow within and between islands suggested that human activity such as planting of  
619 infected seedlings may have promoted the movement of *P. noxius*, which provides an  
620 artificial environment for population to increase. The within-population  
621 hyperdiversity, prevalence of monokaryotic isolates, and sporadic pattern of new

622 disease foci also support the involvement of basidiospores in *P. noxius* dissemination.  
623 Considering its host range and fast-growing ability in warm weather, and the  
624 abundant basidiospores that can be produced from perennial fruiting bodies with huge  
625 dispersal potential (e.g., the basidiospores of *Heterobasidion annosum* and  
626 *Peniophora aurantiaca* were captured 50–500 km and ~1000 km apart from the  
627 inoculum source), *P. noxius* may potentially affect more agricultural, ecological, and  
628 residential environments. A preliminary model based on 19 bioclimatic variables of  
629 known locations of ~100 *P. noxius* isolates from south eastern Asia, Australia, and  
630 Pacific islands predicted that extensive global regions are at risk, which includes a big  
631 part of the South American continent (Klopfenstein et al., 2016).

632

633 The Hymenochaetales is phylogenetically placed between the better-studied  
634 Agaricales and Ustilaginales orders, making the reference assembly of *P. noxius*  
635 KPN91 an attractive genome to study the evolutionary transition between these orders  
636 of Basidiomycota. It should be of continuous interest to confirm this observation  
637 when more reference genome assemblies become available. Genetic hyperdiversity of  
638 *P. noxius* suggests that the pathogen may have greater adaptability to different  
639 environments and stresses. Associating growth phenotypes under a variety of  
640 conditions to the variations identified in this study will be a logical next step for a full  
641 understanding of the genetic basis underlying the fitness and virulence of white root  
642 rot fungi. For disease control and prevention, much more attention needs to be paid to  
643 monitor how these fungi will behave in changing or extreme weather conditions.

644

645

646

## 647 **Figures and Tables**

648

649 **Fig 1. Life stages of *P. noxius* and comparative genomic analysis of**  
650 **Hymenochaetales species. (a)** The mycelial mat with young creamy leading front  
651 and aged brown section. **(b)** In advanced stage of decay, the hyphae form a network  
652 of brown zone lines permeating the soft and white wood tissue. (Lower left and lower  
653 right) **(c and d)** Basidiocarps are perennial and can be resupinate **(c)** or grow into a  
654 sessile bracket-like conk with a broad basal attachment **(d)**. The distinctive  
655 greyish-brown surface is the hymenial layer with irregularly polygonal pores,  
656 containing four-spored basidia, ellipsoid and hyaline basidiospores, but no hymenial  
657 setae. **(e)** The phylogeny of four *Phellinus* species with 15 other species of  
658 Basidiomycota based on a concatenated alignment of single-copy orthologous genes.  
659 All nodes have 100 out of 100 bootstrap replicates. The numbers of gained (“+”) and  
660 lost (“-”) gene families along each branch of the phylogeny is annotated.

661

662 **Fig 2. Linkage group (LG) network of Basidiomycota. (a)** The linkage groups were  
663 identified by linking single-copy orthologs of scaffolds between species pairs. All  
664 scaffolds included in this plot are larger than 500 kb. Each directional edge points  
665 toward the reference chromosome. Edges were weighted by the number of  
666 single-copy orthologs, and an edge was filtered if it has a weight smaller than 20 or  
667 less than 40% of the sum of all weights out of a node. **(b)** Cross-mapping of  
668 single-copy orthologs in LG10 and 11. Scaffold names are shown at the upper-right  
669 side of each sequence, with detectable telomeric regions labelled as ‘T’ at the  
670 upper-left side.

671

672 **Fig 3. Synteny around the A mating locus.** The analysis included *Phellinus noxius*,  
673 *Porodaedalea pini*, *Phellinus sulphurascens*, *Phellinus lamaensis*, two other species

674 from Hymenochaetales species (*Fomitiporia mediterranea*, *Schizopora paradoxa*),  
675 two species from Agaricales (*Laccaria bicolor*, *Coprinopsis cinerea*),  
676 *Sistotremastrum niveocremeum*, and *Ustilago maydis*.

677

678 **Fig 4. Orthology network of genes in the A locus of *P. noxius*.** Each node in this  
679 plot represents a gene. An edge is added if two genes are in proximity (physically  
680 separated by less than two genes). Numbers next to the edges and nodes are number  
681 of occurrences of different combinations of genes in each species. For example, 77  
682 members of OG0000015 orthogroup in *P. lamaensis* are found adjacent to each other  
683 on the genome. Another 37 members of this orthogroup are dispersed throughout the  
684 genome and are not located in proximity to any members of the 9 orthogroups.

685

686 **Fig 5. The population genomics of 60 *P. noxius* isolates.** (a) Map of Taiwan and  
687 offshore islands of Japan showing origins of the 60 sampled *P. noxius* isolates.  
688 Ogasawara islands were conveniently drawn below Ryukyu islands so this does not  
689 represent their actual location. (b) PCA plot of 60 *P. noxius* isolates using  
690 genome-wide variation data sampled from 13 islands by the first three eigenvectors.  
691 (c) Top: Phylogenetic tree with 100 bootstrap using SNPs computed from alignment  
692 to KPN91 reference. Point separating the Taiwan-Ryukyu and Ogasawara island  
693 isolates was used as root. Nodes with >90% bootstrap were labelled with circles.  
694 Bottom: fastSTRUCTURE analysis of the linkage independent pruned set of variation  
695 data. A model with two ancestral components ( $K=2$ ) had the highest likelihood to  
696 explain the variation of genome-wide structure on the 60 isolates. Also see Fig. S7 for  
697 different  $K$ .

698

699 **Fig 6. Heterozygosity and allele frequencies of *P. noxius*.** (a) Boxplot showing  
700 abundances of heterozygous SNPs inferred in each *P. noxius* isolate can be  
701 categorised into four groups. (b) Density plot of minor allele frequencies (MAF) of  
702 heterozygous SNPs in 60 isolates of *P. noxius*. \*Asterisk denote group containing two  
703 isolates that were cultured from basidiospores.

704

705 **Fig. 7 Weighted  $F_{ST}$  values for 5kb windows across the *P. noxius* assembly.** Red

706 colour dots indicate windows having  $F_{ST}$  value greater than 99.9% tail of 0.55. The

707 12-kb candidate region is marked in blue star. Annotations and references of genes

708 located in this candidate region are listed.

709

710

711 **Table 1. Polymorphism in the two regional lineages of *P. noxius*.**

712

713

714

715

716 **Availability of data and materials:**

717 Genome assemblies and annotations are available from NCBI under whole genome  
718 shotgun (WGS) ID: NBII000000000 (*P. noxius*), NBBA000000000 (*P. sulphurascens*),  
719 NBAY000000000 (*P. pini*) and NBAZ000000000 (*P. lamaensis*). Bioproject and  
720 Biosample ID of raw data are available in Table S1 and S2.

721

722 **Author's contributions:**

723 Strain cultivation and preparation: H.H.L., T.J.L, H.M.K, M.A., T.H., Y.O., N.S. and  
724 T.K. Strain provider: C.L.C., R.F.L., S.S.T., P.J.A., J.N.T., M.A., T.H., Y.O., N.S.  
725 Strain sequencing and assembly: C.L.C., H.H.L., C.Y.C., M.J.L., T.K. and I.J.T.  
726 Annotation and manual curation: H.M.K., T.J.L and I.J.T. Comparative genomics  
727 analysis: T.H.K, D.L., M.B.R., H.M.K. and I.J.T. Population genomics analysis:  
728 H.M.K., T.J.L and I.J.T. Mating locus analysis: C.L.C., H.H.L., Y.Y.C., T.H.K., I.J.T.  
729 RNA-seq analysis: T.J.L and I.J.T. Wrote the manuscript: C.L.C, T.J.L, H.H.L, T.K  
730 and I.J.T. Conceived and directed the project: C.L.C., T.K. and I.J.T.

731

732 **Acknowledgements**

733 We thank John Wang (Biodiversity Research Center, Academia Sinica), Yen-Ping  
734 Hsueh (IMB, Academia Sinica) and Robert Waterhouse (University of Lausanne) for  
735 commenting the manuscript. We thank Chian-mei Wei, Kuan-chun Chen (High  
736 Throughput Genomics Core at Biodiversity Research Center, Academia Sinica) for  
737 sequencing. We thank Tun-Tschu Chang and Yu-Ching Huang for strain collection  
738 and consultation.

739

740 **Funding:**

741 I.J.T. and J.T.L were funded by Ministry of Science and Technology  
742 (105-2628-B-001-002-MY3 and 105-2313-B-001 -003). C.L.C., H.H.L. and Y.Y.C  
743 were funded by the Office of General Affairs, National Taiwan University.

744



## 745 **References**

- 746 Akiba, M., Ota, Y., Tsai, I. J., Hattori, T., Sahashi, N., & Kikuchi, T. (2015). Genetic  
747 Differentiation and Spatial Structure of *Phellinus noxius*, the Causal Agent of  
748 Brown Root Rot of Woody Plants in Japan. *Plos One*, *10*(10), e0141792.  
749 doi:10.1371/journal.pone.0141792
- 750 Alexa, A., & Rahnenfuhrer, J. (2016). topGO: Enrichment Analysis for Gene  
751 Ontology. *R package version 2.26.0*.
- 752 Alfaro, M., Castanera, R., Lavin, J. L., Grigoriev, I. V., Oguiza, J. A., Ramirez, L., &  
753 Pisabarro, A. G. (2016). Comparative and transcriptional analysis of the  
754 predicted secretome in the lignocellulose-degrading basidiomycete fungus  
755 *Pleurotus ostreatus*. *Environ Microbiol*, *18*(12), 4710-4726.  
756 doi:10.1111/1462-2920.13360
- 757 Ann, P., Chang, T., & Ko, W. (2002). *Phellinus noxius* Brown Root Rot of Fruit and  
758 Ornamental Trees in Taiwan. *Plant Disease*, *86*.
- 759 Ann, P. J., Lee, H. L., & Huang, T. C. (1999). Brown Root Rot of 10 Species of Fruit  
760 Trees Caused by *Phellinus noxius* in Taiwan. *Plant Disease*, *83*(8), 746-750.
- 761 Apse, M. P., Aharon, G. S., Snedden, W. A., & Blumwald, E. (1999). Salt tolerance  
762 conferred by overexpression of a vacuolar Na<sup>+</sup>/H<sup>+</sup> antiport in *Arabidopsis*.  
763 *Science*, *285*(5431), 1256-1258.
- 764 Bankevich, A., Nurk, S., Antipov, D., Gurevich, A. A., Dvorkin, M., Kulikov, A.  
765 S., . . . Pevzner, P. A. (2012). SPAdes: A New Genome Assembly Algorithm  
766 and Its Applications to Single-Cell Sequencing. *Journal of Computational*  
767 *Biology*, *19*(5), 455-477. doi:10.1089/cmb.2012.0021
- 768 Baranova, M. A., Logacheva, M. D., Penin, A. A., Seplyarskiy, V. B., Safonova, Y.  
769 Y., Naumenko, S. A., . . . Kondrashov, A. S. (2015). Extraordinary Genetic  
770 Diversity in a Wood Decay Mushroom. *Mol Biol Evol*, *32*(10), 2775-2783.  
771 doi:10.1093/molbev/msv153
- 772 Bidard, F., Clave, C., & Saupe, S. J. (2013). The transcriptional response to nonself in  
773 the fungus *Podospira anserina*. *G3 (Bethesda)*, *3*(6), 1015-1030.  
774 doi:10.1534/g3.113.006262
- 775 Bolger, A. M., Lohse, M., & Usadel, B. (2014). Trimmomatic: a flexible trimmer for  
776 Illumina sequence data. *Bioinformatics*, *30*(15), 2114-2120.  
777 doi:10.1093/bioinformatics/btu170

- 778 Borodovsky, M., & Lomsadze, A. (2011). Eukaryotic gene prediction using  
779 GeneMark.hmm-E and GeneMark-ES. *Curr Protoc Bioinformatics, Chapter 4*,  
780 Unit 4 6 1-10. doi:10.1002/0471250953.bi0406s35
- 781 Butler, J., MacCallum, I., Kleber, M., Shlyakhter, I. A., Belmonte, M. K., Lander, E.  
782 S., . . . Jaffe, D. B. (2008). ALLPATHS: de novo assembly of whole-genome  
783 shotgun microreads. *Genome Res, 18*(5), 810-820. doi:10.1101/gr.7337908
- 784 Castanera, R., Lopez-Varas, L., Borgognone, A., LaButti, K., Lapidus, A., Schmutz,  
785 J., . . . Ramirez, L. (2016). Transposable Elements versus the Fungal Genome:  
786 Impact on Whole-Genome Architecture and Transcriptional Profiles. *PLoS*  
787 *Genet, 12*(6), e1006108. doi:10.1371/journal.pgen.1006108
- 788 Chain, P. S., Grafham, D. V., Fulton, R. S., Fitzgerald, M. G., Hostetler, J., Muzny,  
789 D., . . . Detter, J. C. (2009). Genomics. Genome project standards in a new era  
790 of sequencing. *Science, 326*(5950), 236-237. doi:10.1126/science.1180614
- 791 Chang, C. C., Chow, C. C., Tellier, L. C., Vattikuti, S., Purcell, S. M., & Lee, J. J.  
792 (2015). Second-generation PLINK: rising to the challenge of larger and richer  
793 datasets. *Gigascience, 4*, 7. doi:10.1186/s13742-015-0047-8
- 794 Chang, T.-T. (1992). Decline of some forest trees associated with brown root rot  
795 caused by *Phellinus noxius*. *Plant Pathology Bulletin, 1*(2), 90-95.
- 796 Chin, C.-S., Alexander, D. H., Marks, P., Klammer, A. A., Drake, J., Heiner, C., . . .  
797 Korlach, J. (2013). Nonhybrid, finished microbial genome assemblies from  
798 long-read SMRT sequencing data. *Nature Methods, 10*(6), 563-569.  
799 doi:10.1038/nmeth.2474
- 800 Chin, C.-S., Peluso, P., Sedlazeck, F. J., Nattestad, M., Concepcion, G. T., Clum,  
801 A., . . . Schatz, M. C. (2016). Phased diploid genome assembly with  
802 single-molecule real-time sequencing. *Nature Methods, 13*(12), 1050-1054.  
803 doi:10.1038/nmeth.4035
- 804 Chung, C.-L., Huang, S.-Y., Huang, Y.-C., Tzean, S.-S., Ann, P.-J., Tsai, J.-N., . . .  
805 Liou, R.-F. (2015). The Genetic Structure of *Phellinus noxius* and  
806 Dissemination Pattern of Brown Root Rot Disease in Taiwan. *Plos One*,  
807 *10*(10), e0139445. doi:10.1371/journal.pone.0139445
- 808 Conesa, A., Gotz, S., Garcia-Gomez, J. M., Terol, J., Talon, M., & Robles, M. (2005).  
809 Blast2GO: a universal tool for annotation, visualization and analysis in  
810 functional genomics research. *Bioinformatics, 21*(18), 3674-3676.  
811 doi:10.1093/bioinformatics/bti610

- 812 Cunniffe, N. J., Cobb, R. C., Meentemeyer, R. K., Rizzo, D. M., & Gilligan, C. A.  
813 (2016). Modeling when, where, and how to manage a forest epidemic,  
814 motivated by sudden oak death in California. *Proc Natl Acad Sci U S A*,  
815 *113*(20), 5640-5645. doi:10.1073/pnas.1602153113
- 816 Danecek, P., Auton, A., Abecasis, G., Albers, C. A., Banks, E., DePristo, M. A., . . .  
817 Genomes Project Analysis, G. (2011). The variant call format and VCFtools.  
818 *Bioinformatics*, *27*(15), 2156-2158. doi:10.1093/bioinformatics/btr330
- 819 Dashtban, M., Schraft, H., Syed, T. A., & Qin, W. (2010). Fungal biodegradation and  
820 enzymatic modification of lignin. *Int J Biochem Mol Biol*, *1*(1), 36-50.
- 821 Douglas, C. M. (2001). Fungal beta(1,3)-D-glucan synthesis. *Med Mycol*, *39 Suppl 1*,  
822 55-66.
- 823 Emms, D. M., & Kelly, S. (2015). OrthoFinder: solving fundamental biases in whole  
824 genome comparisons dramatically improves orthogroup inference accuracy.  
825 *Genome Biol*, *16*, 157. doi:10.1186/s13059-015-0721-2
- 826 Felsenstein, J. (2005). PHYLIP (Phylogeny Inference Package) version 3.6.  
827 *Distributed by the author. Department of Genome Sciences, University of*  
828 *Washington, Seattle.*
- 829 Finn, R. D., Coghill, P., Eberhardt, R. Y., Eddy, S. R., Mistry, J., Mitchell, A. L., . . .  
830 Bateman, A. (2016). The Pfam protein families database: towards a more  
831 sustainable future. *Nucleic Acids Research*, *44*(D1), D279-D285.  
832 doi:10.1093/nar/gkv1344
- 833 Fisher, M. C., Henk, D. A., Briggs, C. J., Brownstein, J. S., Madoff, L. C., McCraw, S.  
834 L., & Gurr, S. J. (2012). Emerging fungal threats to animal, plant and  
835 ecosystem health. *Nature*, *484*(7393), 186-194. doi:10.1038/nature10947
- 836 Floudas, D., Binder, M., Riley, R., Barry, K., Blanchette, R. A., Henrissat, B., . . .  
837 Hibbett, D. S. (2012). The Paleozoic origin of enzymatic lignin decomposition  
838 reconstructed from 31 fungal genomes. *Science*, *336*(6089), 1715-1719.  
839 doi:10.1126/science.1221748
- 840 Foulongne-Oriol, M., Rocha de Brito, M., Cabannes, D., Clément, A., Spataro, C.,  
841 Moinard, M., . . . Savoie, J.-M. (2016). The Genetic Linkage Map of the  
842 Medicinal Mushroom *Agaricus subrufescens* Reveals Highly Conserved  
843 Macrosynteny with the Congeneric Species *Agaricus bisporus*. *G3:*  
844 *Genes/Genomes/Genetics*, *6*(5), 1217-1226. doi:10.1534/g3.115.025718
- 845 Garrison, E., & Marth, G. (2012). Haplotype-based variant detection from short-read  
846 sequencing. *arXiv*, *1207*, 3907.

- 847 Goberville, E., Hautekeete, N. C., Kirby, R. R., Piquot, Y., Luczak, C., & Beaugrand,  
848 G. (2016). Climate change and the ash dieback crisis. *Sci Rep*, 6, 35303.  
849 doi:10.1038/srep35303
- 850 Grigoriev, I. V., Nikitin, R., Haridas, S., Kuo, A., Ohm, R., Otilar, R., . . . Shabalov, I.  
851 (2014). MycoCosm portal: gearing up for 1000 fungal genomes. *Nucleic Acids*  
852 *Research*, 42(D1), D699-D704. doi:10.1093/nar/gkt1183
- 853 Gross, A., Holdenrieder, O., Pautasso, M., Queloz, V., & Sieber, T. N. (2014).  
854 *Hymenoscyphus pseudoalbidus*, the causal agent of European ash dieback.  
855 *Mol Plant Pathol*, 15(1), 5-21. doi:10.1111/mpp.12073
- 856 Guy, L., Roat Kultima, J., & Andersson, S. G. E. (2010). genoPlotR: comparative  
857 gene and genome visualization in R. *Bioinformatics*, 26(18), 2334-2335.  
858 doi:10.1093/bioinformatics/btq413
- 859 Hane, J. K., Rouxel, T., Howlett, B. J., Kema, G. H., Goodwin, S. B., & Oliver, R. P.  
860 (2011). A novel mode of chromosomal evolution peculiar to filamentous  
861 Ascomycete fungi. *Genome Biol*, 12(5), R45. doi:10.1186/gb-2011-12-5-r45
- 862 Hattori, T., Abe, Y., & Usugi, T. (1996). Distribution of clones of *Phellinus noxius* in  
863 a windbreak on Ishigaki Island. *European Journal of Forest Pathology*, 26(2),  
864 69-80. doi:10.1111/j.1439-0329.1996.tb00711.x
- 865 Hepting, G. H. (1971). *Diseases of forest and shade trees of the United States*: U.S.  
866 Dept. Of Agriculture Forest Service Handbook Number 386.
- 867 Hoff, K. J., Lange, S., Lomsadze, A., Borodovsky, M., & Stanke, M. (2016).  
868 BRAKER1: Unsupervised RNA-Seq-Based Genome Annotation with  
869 GeneMark-ET and AUGUSTUS. *Bioinformatics*, 32(5), 767-769.  
870 doi:10.1093/bioinformatics/btv661
- 871 Huang, H., Sun, L., Bi, K., Zhong, G., & Hu, M. (2016). The effect of  
872 phenazine-1-carboxylic acid on the morphological, physiological, and  
873 molecular characteristics of *Phellinus noxius*. *Molecules*, 21(5), 613.
- 874 Hunt, M., Kikuchi, T., Sanders, M., Newbold, C., Berriman, M., & Otto, T. D. (2013).  
875 REAPR: a universal tool for genome assembly evaluation. *Genome biology*,  
876 14, R47. doi:10.1186/gb-2013-14-5-r47
- 877 James, T. Y., Lee, M., & van Diepen, L. T. (2011). A single mating-type locus  
878 composed of homeodomain genes promotes nuclear migration and  
879 heterokaryosis in the white-rot fungus *Phanerochaete chrysosporium*.  
880 *Eukaryot Cell*, 10(2), 249-261. doi:10.1128/EC.00212-10

- 881 James, T. Y., Srivilai, P., Kues, U., & Vilgalys, R. (2006). Evolution of the bipolar  
882 mating system of the mushroom *Coprinellus disseminatus* from its tetrapolar  
883 ancestors involves loss of mating-type-specific pheromone receptor function.  
884 *Genetics*, *172*(3), 1877-1891. doi:10.1534/genetics.105.051128
- 885 James, T. Y., Sun, S., Li, W., Heitman, J., Kuo, H. C., Lee, Y. H., . . . Olson, A.  
886 (2013). Polyporales genomes reveal the genetic architecture underlying  
887 tetrapolar and bipolar mating systems. *Mycologia*, *105*(6), 1374-1390.  
888 doi:10.3852/13-162
- 889 Jancova, P., Anzenbacher, P., & Anzenbacherova, E. (2010). Phase II drug  
890 metabolizing enzymes. *Biomed Pap Med Fac Univ Palacky Olomouc Czech*  
891 *Repub*, *154*(2), 103-116.
- 892 Jones, P., Binns, D., Chang, H.-Y., Fraser, M., Li, W., McAnulla, C., . . . Hunter, S.  
893 (2014). InterProScan 5: genome-scale protein function classification.  
894 *Bioinformatics*, *30*(9), 1236-1240. doi:10.1093/bioinformatics/btu031
- 895 Kamper, J., Kahmann, R., Bolker, M., Ma, L. J., Brefort, T., Saville, B. J., . . . Birren,  
896 B. W. (2006). Insights from the genome of the biotrophic fungal plant  
897 pathogen *Ustilago maydis*. *Nature*, *444*(7115), 97-101.  
898 doi:10.1038/nature05248
- 899 Katoh, K., & Standley, D. M. (2014). MAFFT: iterative refinement and additional  
900 methods. *Methods Mol Biol*, *1079*, 131-146.  
901 doi:10.1007/978-1-62703-646-7\_8
- 902 Klopfenstein, N. B., Pitman, E. W. I., Hanna, J. W., Cannon, P. G., Stewart, J. E.,  
903 Sahashi, N., . . . Kim, M.-S. (2016). *A preliminary bioclimatic approach to*  
904 *predicting potential distribution of Phellinus noxious and geographical areas*  
905 *at risk from invasion*. Paper presented at the Proceedings of the 63rd Annual  
906 Western International Forest Disease Work Conference.
- 907 Koboldt, D. C., Zhang, Q., Larson, D. E., Shen, D., McLellan, M. D., Lin, L., . . .  
908 Wilson, R. K. (2012). VarScan 2: Somatic mutation and copy number  
909 alteration discovery in cancer by exome sequencing. *Genome research*, *22*(3),  
910 568-576. doi:10.1101/gr.129684.111
- 911 Kües, U. (2015). From two to many: multiple mating types in Basidiomycetes.  
912 *Fungal Biology Reviews*, *29*(3-4), 126-166.  
913 doi:http://dx.doi.org/10.1016/j.fbr.2015.11.001

- 914 Kumar, S., Stecher, G., & Tamura, K. (2016). MEGA7: Molecular Evolutionary  
915 Genetics Analysis Version 7.0 for Bigger Datasets. *Mol Biol Evol*, 33(7),  
916 1870-1874. doi:10.1093/molbev/msw054
- 917 Kurtz, S., Phillippy, A., Delcher, A. L., Smoot, M., Shumway, M., Antonescu, C., &  
918 Salzberg, S. L. (2004). Versatile and open software for comparing large  
919 genomes. *Genome Biology*, 5(2), R12.
- 920 Lam, K. K., LaButti, K., Khalak, A., & Tse, D. (2015). FinisherSC: a repeat-aware  
921 tool for upgrading de novo assembly using long reads. *Bioinformatics*, 31(19),  
922 3207-3209. doi:10.1093/bioinformatics/btv280
- 923 Larsson, K.-H., Parmasto, E., Fischer, M., Langer, E., Nakasone, K. K., & Redhead, S.  
924 a. (2006). Hymenochaetales: a molecular phylogeny for the hymenochaetoid  
925 clade. *Mycologia*, 98, 926-936.
- 926 Lavezzo, E., Falda, M., Fontana, P., Bianco, L., & Toppo, S. (2016). Enhancing  
927 protein function prediction with taxonomic constraints--The Argot2.5 web  
928 server. *Methods*, 93, 15-23. doi:10.1016/j.ymeth.2015.08.021
- 929 Leffler, E. M., Bullaughey, K., Matute, D. R., Meyer, W. K., Segurel, L., Venkat,  
930 A., . . . Przeworski, M. (2012). Revisiting an old riddle: what determines  
931 genetic diversity levels within species? *PLoS Biol*, 10(9), e1001388.  
932 doi:10.1371/journal.pbio.1001388
- 933 Leipe, D. D., Koonin, E. V., & Aravind, L. (2004). STAND, a class of P-loop  
934 NTPases including animal and plant regulators of programmed cell death:  
935 multiple, complex domain architectures, unusual phyletic patterns, and  
936 evolution by horizontal gene transfer. *J Mol Biol*, 343(1), 1-28.  
937 doi:10.1016/j.jmb.2004.08.023
- 938 Li, H., Handsaker, B., Wysoker, A., Fennell, T., Ruan, J., Homer, N., . . . Durbin, R.  
939 (2009). The Sequence Alignment/Map format and SAMtools. *Bioinformatics*  
940 (*Oxford, England*), 25, 2078-2079. doi:10.1093/bioinformatics/btp352
- 941 Loftus, B. J., Fung, E., Roncaglia, P., Rowley, D., Amedeo, P., Bruno, D., . . . Hyman,  
942 R. W. (2005). The genome of the basidiomycetous yeast and human pathogen  
943 *Cryptococcus neoformans*. *Science*, 307(5713), 1321-1324.  
944 doi:10.1126/science.1103773
- 945 Martin, F., Aerts, A., Ahren, D., Brun, A., Danchin, E. G., Duchaussoy, F., . . .  
946 Grigoriev, I. V. (2008). The genome of *Laccaria bicolor* provides insights into  
947 mycorrhizal symbiosis. *Nature*, 452(7183), 88-92. doi:10.1038/nature06556

- 948 Maurer-Stroh, S., & Eisenhaber, F. (2005). Refinement and prediction of protein  
949 prenylation motifs. *Genome biology*, 6(6), R55.
- 950 Min, B., Park, H., Jang, Y., Kim, J. J., Kim, K. H., Pangilinan, J., . . . Choi, I. G.  
951 (2015). Genome sequence of a white rot fungus *Schizophora paradoxa*  
952 KUC8140 for wood decay and mycoremediation. *J Biotechnol*, 211, 42-43.  
953 doi:10.1016/j.jbiotec.2015.06.426
- 954 Morin, E., Kohler, A., Baker, A. R., Foulongne-Oriol, M., Lombard, V., Nagy, L.  
955 G., . . . Martin, F. (2012). Genome sequence of the button mushroom *Agaricus*  
956 *bisporus* reveals mechanisms governing adaptation to a humic-rich ecological  
957 niche. *Proc Natl Acad Sci U S A*, 109(43), 17501-17506.  
958 doi:10.1073/pnas.1206847109
- 959 Nagy, L. G., Riley, R., Tritt, A., Adam, C., Daum, C., Floudas, D., . . . Hibbett, D. S.  
960 (2016). Comparative Genomics of Early-Diverging Mushroom-Forming Fungi  
961 Provides Insights into the Origins of Lignocellulose Decay Capabilities. *Mol*  
962 *Biol Evol*, 33(4), 959-970. doi:10.1093/molbev/msv337
- 963 Nandris, D., Nicole, M., & Geiger, J. P. (1987). Variation in virulence among  
964 *Rigidoporus lignosus* and *Phellinus noxius* isolates from West Africa1.  
965 *European Journal of Forest Pathology*, 17(4-5), 271-281.  
966 doi:10.1111/j.1439-0329.1987.tb01026.x
- 967 Niculita-Hirzel, H., Labbe, J., Kohler, A., le Tacon, F., Martin, F., Sanders, I. R., &  
968 Kues, U. (2008). Gene organization of the mating type regions in the  
969 ectomycorrhizal fungus *Laccaria bicolor* reveals distinct evolution between  
970 the two mating type loci. *New Phytol*, 180(2), 329-342.  
971 doi:10.1111/j.1469-8137.2008.02525.x
- 972 Ohm, R. A., de Jong, J. F., Lugones, L. G., Aerts, A., Kothe, E., Stajich, J. E., . . .  
973 Wosten, H. A. (2010). Genome sequence of the model mushroom  
974 *Schizophyllum commune*. *Nat Biotechnol*, 28(9), 957-963.  
975 doi:10.1038/nbt.1643
- 976 Olson, A., Aerts, A., Asiegbu, F., Belbahri, L., Bouzid, O., Broberg, A., . . . Stenlid, J.  
977 (2012). Insight into trade-off between wood decay and parasitism from the  
978 genome of a fungal forest pathogen. *New Phytol*, 194(4), 1001-1013.  
979 doi:10.1111/j.1469-8137.2012.04128.x
- 980 Parra, G., Bradnam, K., & Korf, I. (2007). CEGMA: a pipeline to accurately annotate  
981 core genes in eukaryotic genomes. *Bioinformatics (Oxford, England)*, 23,  
982 1061-1067. doi:10.1093/bioinformatics/btm071

- 983 Potter, C., Harwood, T., Knight, J., & Tomlinson, I. (2011). Learning from history,  
984 predicting the future: the UK Dutch elm disease outbreak in relation to  
985 contemporary tree disease threats. *Philos Trans R Soc Lond B Biol Sci*,  
986 366(1573), 1966-1974. doi:10.1098/rstb.2010.0395
- 987 Price, M. N., Dehal, P. S., & Arkin, A. P. (2009). FastTree: Computing Large  
988 Minimum Evolution Trees with Profiles instead of a Distance Matrix.  
989 *Molecular Biology and Evolution*, 26(7), 1641-1650.  
990 doi:10.1093/molbev/msp077
- 991 Raj, A., Stephens, M., & Pritchard, J. K. (2014). fastSTRUCTURE: Variational  
992 Inference of Population Structure in Large SNP Data Sets. *Genetics*, 197(2),  
993 573-589. doi:10.1534/genetics.114.164350
- 994 Riley, R., Salamov, a. a., Brown, D. W., Nagy, L. G., Floudas, D., Held, B. W., . . .  
995 Grigoriev, I. V. (2014b). Extensive sampling of basidiomycete genomes  
996 demonstrates inadequacy of the white-rot/brown-rot paradigm for wood decay  
997 fungi. *Proceedings of the National Academy of Sciences*.  
998 doi:10.1073/pnas.1400592111
- 999 Sahashi, N., Akiba, M., Ishihara, M., Miyazaki, K., & Kanzaki, N. (2010). Cross  
1000 Inoculation Tests with *Phellinus noxius* Isolates from Nine Different Host  
1001 Plants in the Ryukyu Islands, Southwestern Japan. *Plant Disease*, 94(3),  
1002 358--360.
- 1003 Sahashi, N., Akiba, M., Ishihara, M., Ota, Y., & Kanzaki, N. (2012). Brown root rot  
1004 of trees caused by *Phellinus noxius* in the Ryukyu Islands, subtropical areas of  
1005 Japan. *Forest Pathology*, 42, 353-361.
- 1006 Sahashi, N., Akiba, M., Takemoto, S., Yokoi, T., Ota, Y., & Kanzaki, N. (2014).  
1007 *Phellinus noxius* causes brown root rot on four important conifer species in  
1008 Japan. *European Journal of Plant Pathology*, 140(4), 869--873.
- 1009 Schwartz, S., Zhang, Z., Frazer, K. A., Smit, A., Riemer, C., Bouck, J., . . . Miller, W.  
1010 (2000). PipMaker--a web server for aligning two genomic DNA sequences.  
1011 *Genome Research*, 10(4), 577--586.
- 1012 Schwarze, F., Jauss, F., Spencer, C., Hallam, C., & Schubert, M. (2012). Evaluation  
1013 of an antagonistic *Trichoderma* strain for reducing the rate of wood  
1014 decomposition by the white rot fungus *Phellinus noxius*. *Biological Control*,  
1015 61(2), 160--168.
- 1016 Simão, F. A., Waterhouse, R. M., Ioannidis, P., Kriventseva, E. V., & Zdobnov, E. M.  
1017 (2015). BUSCO: assessing genome assembly and annotation completeness



- 1018 with single-copy orthologs. *Bioinformatics*, 31(19), 3210-3212.  
1019 doi:10.1093/bioinformatics/btv351
- 1020 Stajich, J. E., Wilke, S. K., Ahren, D., Au, C. H., Birren, B. W., Borodovsky, M., . . .  
1021 Pukkila, P. J. (2010). Insights into evolution of multicellular fungi from the  
1022 assembled chromosomes of the mushroom *Coprinopsis cinerea* (*Coprinus*  
1023 *cinereus*). *Proceedings of the National Academy of Sciences*, 107(26),  
1024 11889-11894. doi:10.1073/pnas.1003391107
- 1025 Stamatakis, A. (2006). RAxML-VI-HPC: maximum likelihood-based phylogenetic  
1026 analyses with thousands of taxa and mixed models. *Bioinformatics (Oxford,*  
1027 *England)*, 22, 2688-2690. doi:10.1093/bioinformatics/btl446
- 1028 Stanke, M., Tzvetkova, A., & Morgenstern, B. (2006). AUGUSTUS at EGASP: using  
1029 EST, protein and genomic alignments for improved gene prediction in the  
1030 human genome. *Genome biology*, 7 Suppl 1, S11.11-18.  
1031 doi:10.1186/gb-2006-7-s1-s11
- 1032 Steffens, A., Brautigam, A., Jakoby, M., & Hulskamp, M. (2015). The BEACH  
1033 Domain Protein SPIRRIG Is Essential for Arabidopsis Salt Stress Tolerance  
1034 and Functions as a Regulator of Transcript Stabilization and Localization.  
1035 *PLoS Biol*, 13(7), e1002188. doi:10.1371/journal.pbio.1002188
- 1036 Suzuki, H., MacDonald, J., Syed, K., Salamov, A., Hori, C., Aerts, A., . . . Master, E.  
1037 R. (2012). Comparative genomics of the white-rot fungi, *Phanerochaete*  
1038 *carnea* and *P. chrysosporium*, to elucidate the genetic basis of the distinct  
1039 wood types they colonize. *BMC Genomics*, 13(1).  
1040 doi:10.1186/1471-2164-13-444
- 1041 Szeto, C. Y., Leung, G. S., & Kwan, H. S. (2007). Le.MAPK and its interacting  
1042 partner, Le.DRMIP, in fruiting body development in *Lentinula edodes*. *Gene*,  
1043 393(1-2), 87-93. doi:10.1016/j.gene.2007.01.030
- 1044 Van der Nest, M. A., Olson, A., Lind, M., Velez, H., Dalman, K., Brandstrom Durling,  
1045 M., . . . Stenlid, J. (2014). Distribution and evolution of het gene homologs in  
1046 the basidiomycota. *Fungal Genet Biol*, 64, 45-57.  
1047 doi:10.1016/j.fgb.2013.12.007
- 1048 van Peer, A. F., Park, S.-Y., Shin, P.-G., Jang, K.-Y., Yoo, Y.-B., Park, Y.-J., . . .  
1049 Kong, W.-S. (2011). Comparative genomics of the mating-type loci of the  
1050 mushroom *Flammulina velutipes* reveals widespread synteny and recent  
1051 inversions. *Plos One*, 6(7), e22249. doi:10.1371/journal.pone.0022249

- 1052 Vilella, A. J., Blanco-Garcia, A., Hutter, S., & Rozas, J. (2005). VariScan: Analysis  
1053 of evolutionary patterns from large-scale DNA sequence polymorphism data.  
1054 *Bioinformatics*, 21(11), 2791-2793. doi:10.1093/bioinformatics/bti403
- 1055 Walker, B. J., Abeel, T., Shea, T., Priest, M., Abouelliel, A., Sakthikumar, S., . . . Earl,  
1056 A. M. (2014). Pilon: An Integrated Tool for Comprehensive Microbial Variant  
1057 Detection and Genome Assembly Improvement. *Plos One*, 9(11), e112963.  
1058 doi:10.1371/journal.pone.0112963
- 1059 Weber, T., Blin, K., Duddela, S., Krug, D., Kim, H. U., Brucoleri, R., . . . Medema,  
1060 M. H. (2015). antiSMASH 3.0—a comprehensive resource for the genome  
1061 mining of biosynthetic gene clusters. *Nucleic Acids Research*, 43(W1),  
1062 W237-W243. doi:10.1093/nar/gkv437
- 1063 Wences, A. H., & Schatz, M. C. (2015). Metassembler: merging and optimizing de  
1064 novo genome assemblies. *Genome biology*, 16(1).  
1065 doi:10.1186/s13059-015-0764-4
- 1066 Wendland, J. (2016). *Growth, Differentiation and Sexuality* (J. Wendland Ed. 3 ed.):  
1067 Springer.
- 1068 Williams, H. L., Sturrock, R. N., Islam, M. A., Hammett, C., Ekramoddoullah, A. K.,  
1069 & Leal, I. (2014). Gene expression profiling of candidate virulence factors in  
1070 the laminated root rot pathogen *Phellinus sulphurascens*. *BMC Genomics*, 15,  
1071 603. doi:10.1186/1471-2164-15-603
- 1072 Wu, J., Peng, S. L., Zhao, H. B., Tang, M. H., Li, F. R., & Chen, B. M. (2011).  
1073 Selection of species resistant to the wood rot fungus *Phellinus noxius*.  
1074 *European Journal of Plant Pathology*, 130(4), 463-467.  
1075 doi:10.1007/s10658-011-9774-6
- 1076 Yin, Y., Mao, X., Yang, J., Chen, X., Mao, F., & Xu, Y. (2012). dbCAN: a web  
1077 resource for automated carbohydrate-active enzyme annotation. *Nucleic Acids*  
1078 *Res*, 40(Web Server issue), W445-451. doi:10.1093/nar/gks479
- 1079 Zhou, L.-W., Vlasák, J., & Dai, Y.-C. (2016). Taxonomy and phylogeny of  
1080 *Phellinidium* (Hymenochaetales, Basidiomycota): A redefinition and the  
1081 segregation of *Coniferiporia* gen. nov. for forest pathogens. *Fungal Biology*,  
1082 120(8), 988-1001. doi:http://dx.doi.org/10.1016/j.funbio.2016.04.008
- 1083 Zuccaro, A., Lahrmann, U., Guldener, U., Langen, G., Pfiffi, S., Biedenkopf, D., . . .  
1084 Kogel, K. H. (2011). Endophytic life strategies decoded by genome and  
1085 transcriptome analyses of the mutualistic root symbiont *Piriformospora indica*.  
1086 *PLoS Pathog*, 7(10), e1002290. doi:10.1371/journal.ppat.1002290

1087

1088

1089

1090

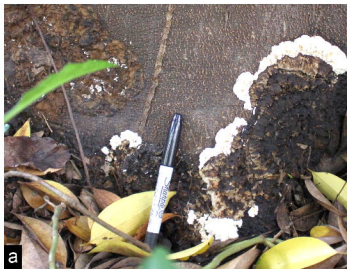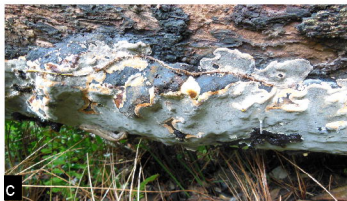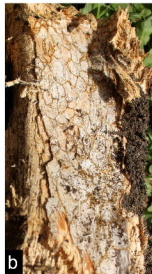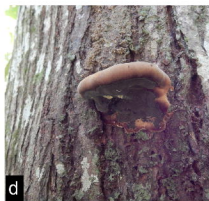

e

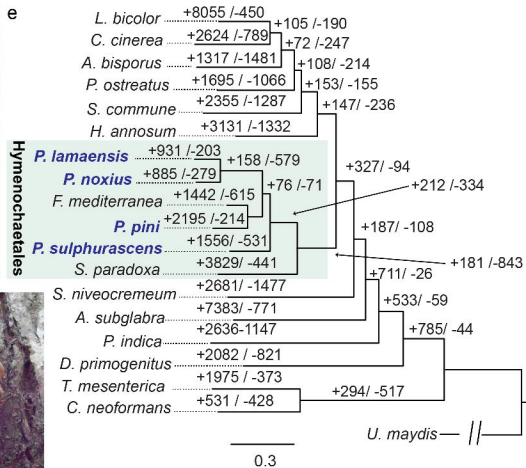

a

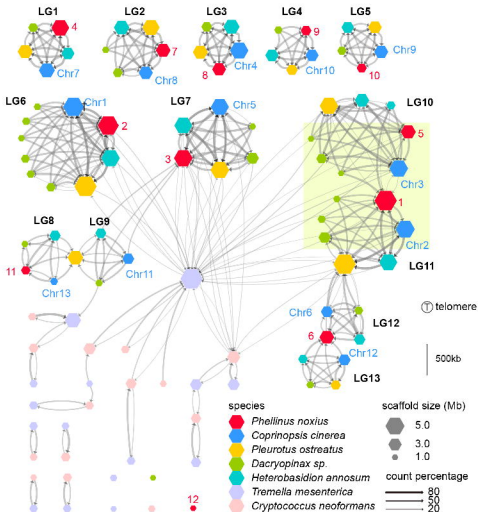

b

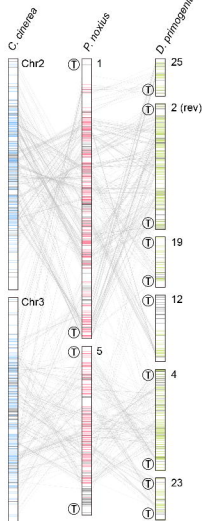

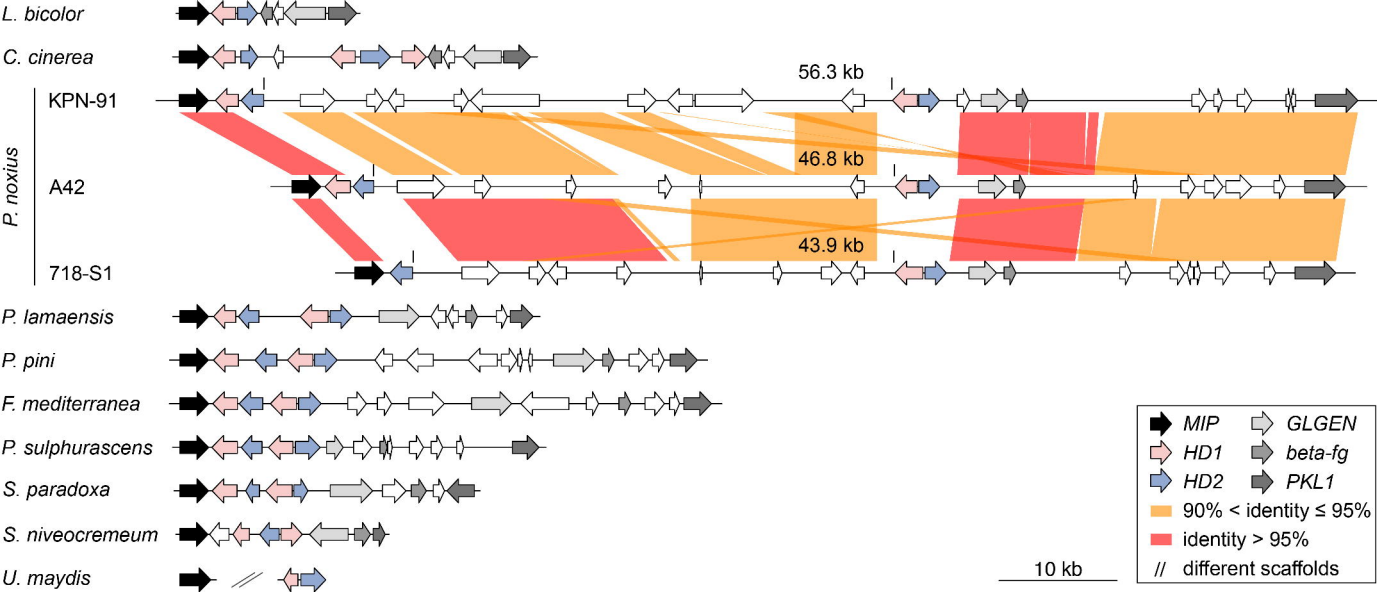

# Phellinus noxius A locus

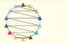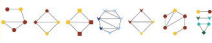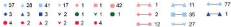

## Orthogroup

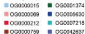

## Species

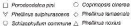





**a**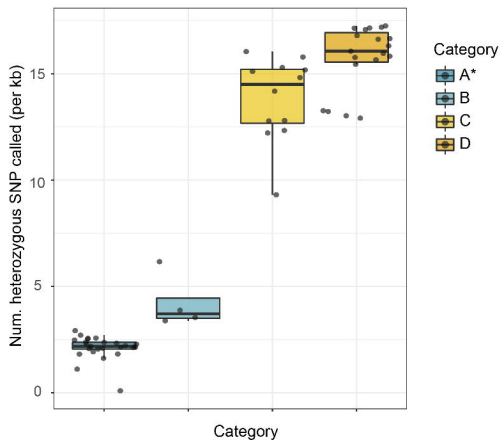**b**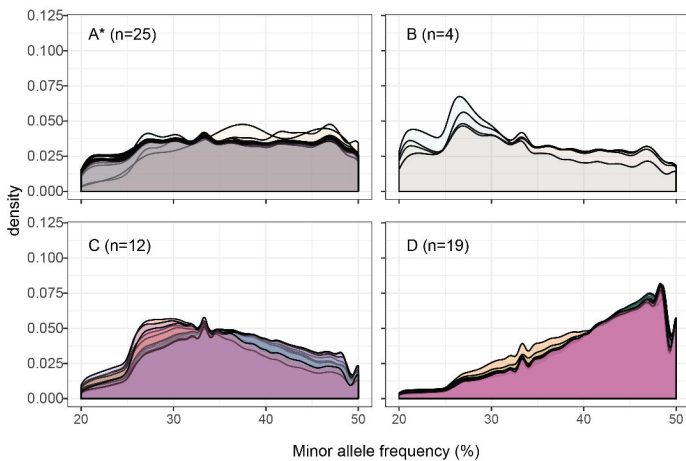

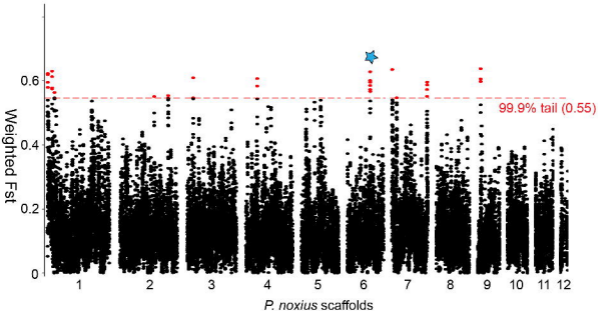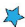

| Gene ID      | Product Description                   | Reference of homologs         |
|--------------|---------------------------------------|-------------------------------|
| PNOK_0653900 | glycosylphosphatidylinositol-anchored | Szeto <i>et al.</i> , 2007    |
| PNOK_0654000 | BEACH-domain-containing protein       | Steffens <i>et al.</i> , 2015 |
| PNOK_0654100 | endo-1,4-beta xylanase                | Bray and Clark (1994)         |
| PNOK_0654200 | hypothetical protein                  | N/A                           |

| Population                             | Analyzed Sites | Segregating sites (S) | Singletons | $\theta\pi$ (x1,000) | $\theta s$ (x1,000) | Tajima's D |
|----------------------------------------|----------------|-----------------------|------------|----------------------|---------------------|------------|
| <b>Whole genome</b>                    |                |                       |            |                      |                     |            |
| Ogasawara (n=9)                        | 30,028,158     | 506,231               | 174,924    | 6.6                  | 6.3                 | 0.3        |
| TaiwanRyukyu (n=51)                    | 31,376,691     | 1,538,598             | 545,324    | 8.0                  | 10.9                | -0.9       |
| TaiwanRyukyu subset (n=9) <sup>1</sup> | 30,640,276     | 749,681               | 408,021    | 8.1                  | 8.9                 | -0.5       |
| <b>Synonymous Sites</b>                |                |                       |            |                      |                     |            |
| Ogasawara (n=9)                        | 4,651,751      | 182,879               | 59,464     | 15.8                 | 14.7                | 0.4        |
| TaiwanRyukyu (n=51)                    | 4,758,211      | 513,717               | 161,353    | 19.2                 | 23.6                | -0.7       |
| TaiwanRyukyu subset (n=9) <sup>1</sup> | 4,704,161      | 269,060               | 136,780    | 19.3                 | 20.5                | -0.4       |
| <b>Replacement Sites</b>               |                |                       |            |                      |                     |            |
| Ogasawara (n=9)                        | 9,794,069      | 71,497                | 25,981     | 2.9                  | 2.8                 | 0.2        |
| TaiwanRyukyu (n=51)                    | 10,018,114     | 230,689               | 93,385     | 3.6                  | 5.3                 | -1.2       |
| TaiwanRyukyu subset (n=9) <sup>1</sup> | 9,904,211      | 103,907               | 60,313     | 3.6                  | 4.0                 | -0.6       |

<sup>1</sup> A random of nine isolates were chosen to repeat the analysis.
